# Supplementary material for: Discovery of a novel potentially transforming somatic mutation in CSF2RB gene in breast cancer
Source: PubMed Central journal article supplement (PMC8607246; doi:10.1002/cam4.4106), 2021-11-02
Supplement: CAM4-10-8138-s001.pdf [file CAM4-10-8138-s001.pdf]

## Supplemental Figures

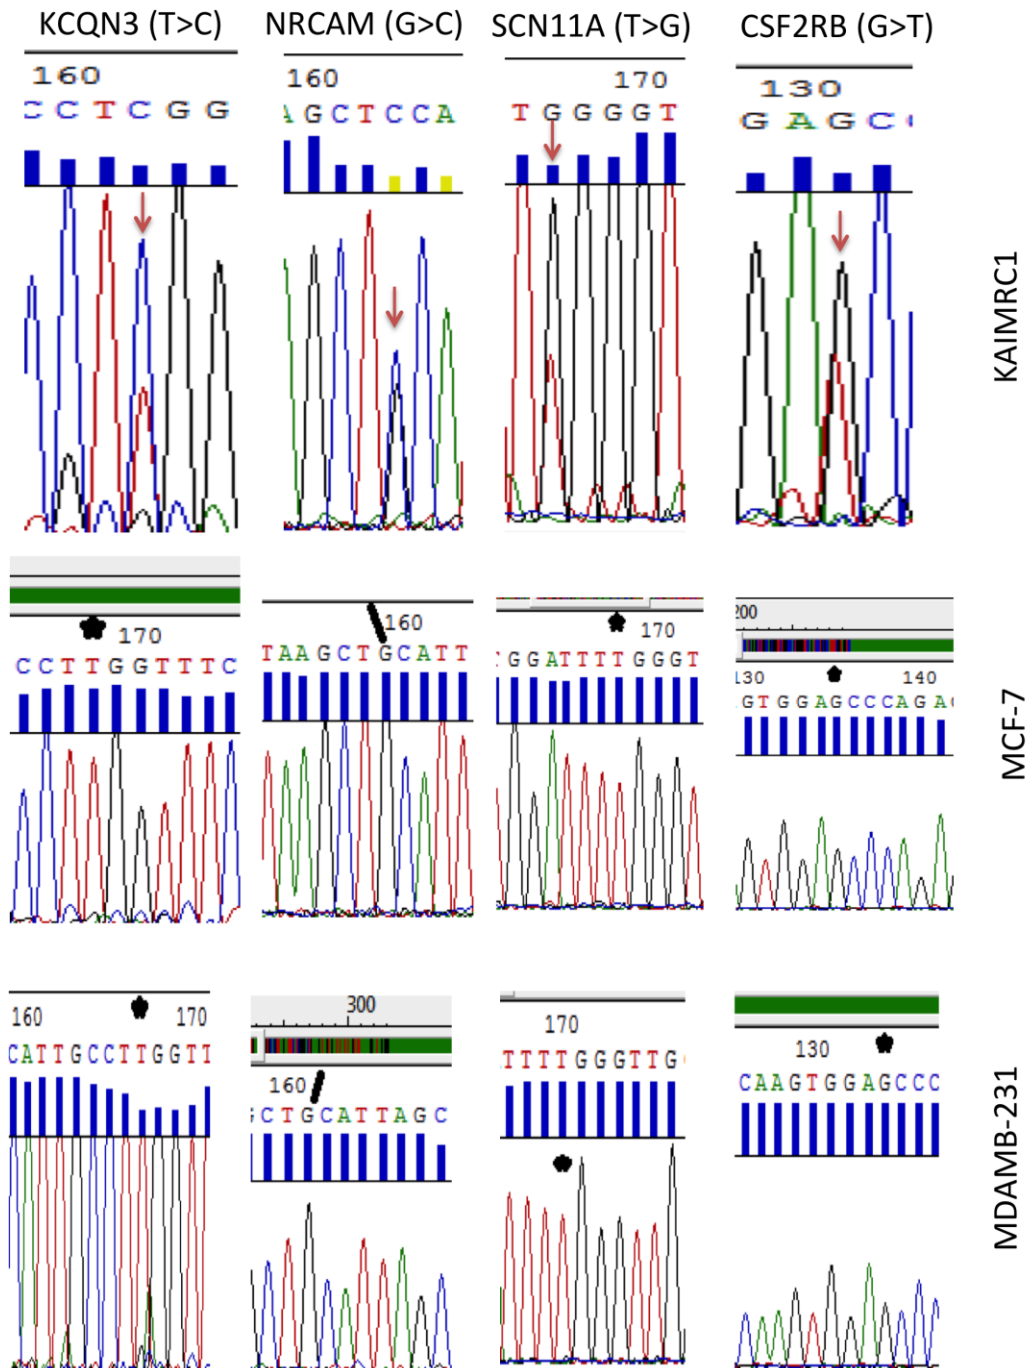

**Figure S1:** Validation of mutations in genes KCQN3, NRCAM, SCN11A, and CSF2RB across breast cancer cell lines using Sanger sequencing protocol. The rightmost panel shows CSF2RB mutation (G>T) in KAIMRC1 cells but not in MDA-MB-231 and MCF-7 cells. The red arrow and asterisks point site of changes.

variant: IL3RB\_HUMAN\_S230I

msa columns order: by specificity  submit

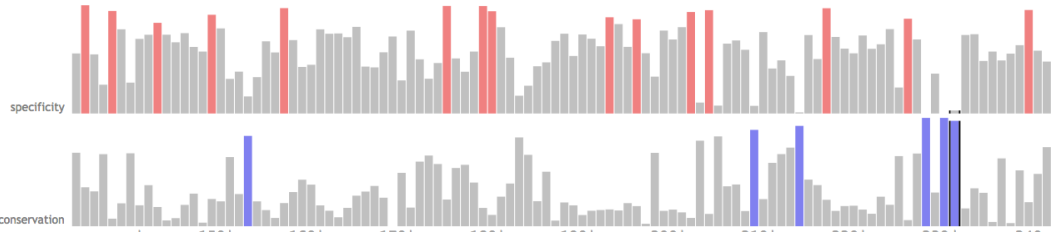

| Species     | Accession    | Position | Sequence | Score |
|-------------|--------------|----------|----------|-------|
| IL3RB_HUMAN | IL3RB_HUMAN  | 230      | I        | 1     |
| F7IKP3      | F7IKP3_CALJA | 230      | I        | 1     |
| F7DHE0      | F7DHE0_HORSE | 230      | I        | 1     |
| H0WSU8      | H0WSU8_OTOGA | 230      | I        | 1     |
| G1LTB8      | G1LTB8_AITME | 230      | I        | 1     |
| F1SKK0      | F1SKK0_PIG   | 230      | I        | 1     |
| E2RIM5      | E2RIM5_CANFA | 230      | I        | 1     |
| G3SX14      | G3SX14_LOXAF | 230      | I        | 1     |
| Q92IA0      | Q92IA0_CAVPO | 230      | I        | 1     |
| G1TK65      | G1TK65_RABIT | 230      | I        | 1     |
| F1MXH7      | F1MXH7_BOVIN | 230      | I        | 1     |
| G3TN89      | G3TN89_CRIGR | 230      | I        | 1     |
| Q3U2T6      | Q3U2T6_MOUSE | 230      | I        | 1     |
| Q7ZF58      | Q7ZF58_RAT   | 230      | I        | 1     |
| Q3UF68      | Q3UF68_LOXAF | 230      | I        | 1     |
| F7F577      | F7F577_ORNAN | 230      | I        | 1     |
| G5BAV8      | G5BAV8_HETGA | 230      | I        | 1     |
| H0ZK65      | H0ZK65_TAEUG | 230      | I        | 1     |
| F1NC64      | F1NC64_CHICK | 230      | I        | 1     |
| G1KSA1      | G1KSA1_ANOCA | 230      | I        | 1     |
| F1NC64      | F1NC64_CHICK | 230      | I        | 1     |
| G1NJ15      | G1NJ15_MELGA | 230      | I        | 1     |
| F6VPW1      | F6VPW1_MONDO | 230      | I        | 1     |
| G3WK14      | G3WK14_SARHA | 230      | I        | 1     |
| F7FJ77      | F7FJ77_MONDO | 230      | I        | 1     |
| H9GEL3      | H9GEL3_ANOCA | 230      | I        | 1     |
| H0ZK68      | H0ZK68_TAEUG | 230      | I        | 1     |
| F1NDV9      | F1NDV9_CHICK | 230      | I        | 1     |
| Q6UA82      | Q6UA82_CANFA | 230      | I        | 1     |
| F6RXT4      | F6RXT4_MONDO | 230      | I        | 1     |
| G3WNS2      | G3WNS2_SARHA | 230      | I        | 1     |
| G1PZM0      | G1PZM0_MYOLI | 230      | I        | 1     |
| H0VUF3      | H0VUF3_CAVPO | 230      | I        | 1     |
| G1SXF3      | G1SXF3_RABIT | 230      | I        | 1     |
| G5BX21      | G5BX21_HETGA | 230      | I        | 1     |
| F6PK9R      | F6PK9R_HORSE | 230      | I        | 1     |
| G1L9A1      | G1L9A1_AITME | 230      | I        | 1     |
| H2ZZ29      | H2ZZ29_LATCH | 230      | I        | 1     |
| F1RQX9      | F1RQX9_PIG   | 230      | I        | 1     |
| E2QZ72      | E2QZ72_CANFA | 230      | I        | 1     |
| G3TPM5      | G3TPM5_LAF   | 230      | I        | 1     |
| F1MFT9      | F1MFT9_BOVIN | 230      | I        | 1     |
| I3M006      | I3M006_SPETR | 230      | I        | 1     |
| H2ZZ29      | H2ZZ29_LATCH | 230      | I        | 1     |
| H0WXY0      | H0WXY0_OTOGA | 230      | I        | 1     |
| Q5U4K2      | Q5U4K2_XENLA | 230      | I        | 1     |
| G1Q835      | G1Q835_MYOLI | 230      | I        | 1     |
| Q8CBU1      | Q8CBU1_MOUSE | 230      | I        | 1     |
| I3L3D5      | I3L3D5_PIG   | 230      | I        | 1     |
| I3N1D4      | I3N1D4_SPETR | 230      | I        | 1     |
| F1N409      | F1N409_BOVIN | 230      | I        | 1     |
| G9K5M5      | G9K5M5_MUSPF | 230      | I        | 1     |
| F1SKK0      | F1SKK0_PIG   | 230      | I        | 1     |
| G3SX14      | G3SX14_LOXAF | 230      | I        | 1     |
| F1MXH7      | F1MXH7_BOVIN | 230      | I        | 1     |
| Q3U2T6      | Q3U2T6_MOUSE | 230      | I        | 1     |
| F7DHE0      | F7DHE0_HORSE | 230      | I        | 1     |
| Q92IA0      | Q92IA0_CAVPO | 230      | I        | 1     |
| Q3UF68      | Q3UF68_LOXAF | 230      | I        | 1     |
| G1LTB8      | G1LTB8_AITME | 230      | I        | 1     |
| E2RIM5      | E2RIM5_CANFA | 230      | I        | 1     |
| P32927      | IL3RB_HUMAN  | 230      | I        | 1     |
| F7IKP3      | F7IKP3_CALJA | 230      | I        | 1     |
| Q7ZF58      | Q7ZF58_RAT   | 230      | I        | 1     |
| H2TYM5      | H2TYM5_TAKRU | 230      | I        | 1     |
| Q63968      | Q63968_9MURI | 230      | I        | 1     |
| G3PSA4      | G3PSA4_GASAC | 230      | I        | 1     |
| Q6UAQ2      | Q6UAQ2_TETNG | 230      | I        | 1     |
| A8WH92      | A8WH92_DANRE | 230      | I        | 1     |
| I336V4      | I336V4_ORENI | 230      | I        | 1     |
| G4RJE0      | G4RJE0_ONCMY | 230      | I        | 1     |
| I33P33      | I33P33_ORENI | 230      | I        | 1     |
| F1R400      | F1R400_DANRE | 230      | I        | 1     |
| G3W556      | G3W556_SARHA | 230      | I        | 1     |
| H3AGM7      | H3AGM7_LATCH | 230      | I        | 1     |
| H0XTC8      | H0XTC8_OTOGA | 230      | I        | 1     |
| Q3U905      | Q3U905_MOUSE | 230      | I        | 1     |

\*\*\* all swissprot (release 2014\_07) human gene positions have been pre-computed and are currently available.  
\*\*\* submission of novel variations for scoring is temporarily unavailable.  
server time spent : 0.027387 secs.  
peak memory used : 3,481,456

**Figure S2:** Conservation of amino acid residues in protein IL3RB\_HUMAN. S230 is highly conserved across vertebrates. This diagram is the output from “mutationassessor” program.
